# Supplementary material for: Empathy and Violence in Schizophrenia and Antisocial Personality Disorder
Source: MDPI journal article supplement (doi:10.3390/healthcare12010089), 2023-12-30
Supplement: s1 [file s1]

**Table S1. Correlations**

|                      |      | Age<br>(years)         | Educati<br>on<br>(years) | PANSSP<br>TOTAL         | PANSSN<br>TOTAL        | PANSSG<br>TOTAL        | FBTTOTAL          | HTTOTAL                | RFP                    | UFPA                   | UFPC                   | EA                     | RMETOTAL               | RMERATIO               | EQTOTA<br>L            |
|----------------------|------|------------------------|--------------------------|-------------------------|------------------------|------------------------|-------------------|------------------------|------------------------|------------------------|------------------------|------------------------|------------------------|------------------------|------------------------|
| Age                  | r(p) | 1.000                  | -0.038<br>(0.7)          | 0.291<br>(0.005)        | 0.256<br>(0.014)       | 0.353<br>(0.001)       | -0.161<br>(0.119) | -0.022<br>(0.830)      | -0.303<br>(0.004)      | -0.375<br>( $<0.001$ ) | -0.333<br>(0.001)      | -0.290<br>(0.006)      | -0.351<br>(0.001)      | -0.376<br>( $<0.001$ ) | -0.208<br>(0.043)      |
| Education<br>(years) | r(p) | -0.038<br>(0.717)      | 1                        | -0.151<br>(0.162)       | 0.089<br>(0.410)       | -0.127<br>(0.244)      | 0.075<br>(0.483)  | 0.077<br>(0.476)       | -0.039<br>(0.729)      | -0.014<br>(0.900)      | 0.005<br>(0.963)       | -0.040<br>(0.722)      | 0.252<br>(0.018)       | 0.235<br>(0.028)       | 0.168<br>(0.115)       |
| PANSSPTOTAL          | r(p) | 0.291<br>(0.005)       | -0.151<br>(0.162)        | 1                       | 0.677<br>( $<0.001$ )  | 0.858<br>( $<0.001$ )  | -0.185<br>(0.079) | -4.27<br>( $<0.001$ )  | -5.48<br>( $<0.001$ )  | -0.552<br>( $<0.001$ ) | -0.514<br>( $<0.001$ ) | -0.566<br>( $<0.001$ ) | -0.393<br>( $<0.001$ ) | -0.437<br>( $<0.001$ ) | -0.495<br>( $<0.001$ ) |
| PANSSNTOTAL          | r(p) | 0.256<br>(0.014)       | 0.089<br>(0.410)         | 0.677<br>( $<0.001$ )   | 1                      | 0.769<br>( $<0.001$ )  | -0.188<br>(0.074) | -0.597<br>( $<0.001$ ) | -0.641<br>( $<0.001$ ) | -0.694<br>( $<0.001$ ) | -0.581<br>( $<0.001$ ) | -0.652<br>( $<0.001$ ) | -0.450<br>( $<0.001$ ) | -0.463<br>( $<0.001$ ) | -0.400<br>( $<0.001$ ) |
| PANSSGTOTAL          | r(p) | 0.353<br>(0.001)       | -0.127<br>(0.244)        | 0.858<br>( $<0.001$ )   | 0.769<br>( $<0.001$ )  | 1                      | -0.215<br>(0.042) | -0.499<br>( $<0.001$ ) | 0.677<br>( $<0.001$ )  | -0.687<br>( $<0.001$ ) | -0.629<br>( $<0.001$ ) | -0.670<br>( $<0.001$ ) | -0.453<br>( $<0.001$ ) | -0.471<br>( $<0.001$ ) | -0.502<br>( $<0.001$ ) |
| FBTTOTAL             | r(p) | -0.161<br>(0.119)      | 0.075<br>(0.483)         | -0.185<br>(0.079)       | -0.188<br>(0.074)      | -0.215<br>(0.042)      | 1                 | 0.195<br>(0.057)       | 0.210<br>(0.047)       | 0.262<br>(0.013)       | 0.128<br>(0.228)       | 0.267<br>(0.011)       | 0.120<br>(0.253)       | 0.135<br>(0.198)       | 0.255<br>(0.013)       |
| HTTOTAL              | r(p) | -0.022<br>(0.830)      | 0.077<br>(0.476)         | -0.427<br>( $<0.001$ )  | -0.597<br>( $<0.001$ ) | -0.499<br>( $<0.001$ ) | 0.195<br>(0.057)  | 1                      | 0.575<br>( $<0.001$ )  | 0.631<br>(0.001)       | 0.564<br>( $<0.001$ )  | 0.659<br>( $<0.001$ )  | 0.467<br>( $<0.001$ )  | 0.456<br>( $<0.001$ )  | 0.483<br>( $<0.001$ )  |
| RFP                  | r(p) | -0.303<br>(0.004)      | -0.039<br>(0.729)        | -0.548<br>( $<0.001$ )  | -0.641<br>( $<0.001$ ) | -0.677<br>( $<0.001$ ) | 0.210<br>(0.047)  | 0.575<br>( $<0.001$ )  | 1                      | 0.866<br>( $<0.001$ )  | 0.711<br>( $<0.001$ )  | 0.842<br>( $<0.001$ )  | 0.568<br>( $<0.001$ )  | 0.569<br>( $<0.001$ )  | 0.470<br>( $<0.001$ )  |
| UFPA                 | r(p) | -0.375<br>( $<0.001$ ) | -0.014<br>(0.900)        | -0.0552<br>( $<0.001$ ) | -0.694<br>( $<0.001$ ) | -0.687<br>( $<0.001$ ) | 0.262<br>(0.013)  | 0.631<br>( $<0.001$ )  | 0.866<br>( $<0.001$ )  | 1                      | 0.835<br>( $<0.001$ )  | 0.910<br>( $<0.001$ )  | 0.638<br>( $<0.001$ )  | 0.626<br>( $<0.001$ )  | 0.491<br>( $<0.001$ )  |
| UFPC                 | r(p) | -0.333<br>(0.001)      | 0.005<br>(0.963)         | -0.514<br>( $<0.001$ )  | -0.581<br>( $<0.001$ ) | -0.629<br>( $<0.001$ ) | 0.128<br>(0.228)  | 0.564<br>( $<0.001$ )  | 0.711<br>( $<0.001$ )  | 0.835<br>( $<0.001$ )  | 1                      | 0.764<br>( $<0.001$ )  | 0.446<br>( $<0.001$ )  | 0.446<br>( $<0.001$ )  | 0.474<br>( $<0.001$ )  |
| EA                   | r(p) | -0.290<br>(0.006)      | -0.040<br>(0.722)        | -0.566<br>( $<0.001$ )  | -0.652<br>( $<0.001$ ) | -0.670<br>( $<0.001$ ) | 0.267<br>(0.011)  | 0.659<br>( $<0.001$ )  | 0.842<br>( $<0.001$ )  | 0.910<br>( $<0.001$ )  | 0.764<br>( $<0.001$ )  | 1                      | 0.614<br>( $<0.001$ )  | 0.600<br>( $<0.001$ )  | 0.561<br>( $<0.001$ )  |
| RMETOTAL             | r(p) | -0.351<br>(0.001)      | 0.252<br>(0.018)         | -0.393<br>( $<0.001$ )  | -0.450<br>( $<0.001$ ) | -0.453<br>( $<0.001$ ) | 0.120<br>(0.253)  | 0.467<br>( $<0.001$ )  | 0.568<br>( $<0.001$ )  | 0.638<br>( $<0.001$ )  | 0.446<br>( $<0.001$ )  | 0.614<br>( $<0.001$ )  | 1                      | 0.985<br>( $<0.001$ )  | 0.428<br>( $<0.001$ )  |
| RMERATIO             | r(p) | -0.376<br>( $<0.001$ ) | 0.235<br>(0.028)         | -0.437<br>( $<0.001$ )  | -0.463<br>( $<0.001$ ) | -0.471<br>( $<0.001$ ) | 0.135<br>(0.198)  | 0.456<br>( $<0.001$ )  | 0.569<br>( $<0.001$ )  | 0.626<br>( $<0.001$ )  | 0.446<br>( $<0.001$ )  | 0.600<br>( $<0.001$ )  | 0.985<br>( $<0.001$ )  | 1                      | 0.436<br>( $<0.001$ )  |
| EQTOTAL              | r(p) | -0.208<br>(0.043)      | 0.168<br>(0.115)         | -0.495<br>( $<0.001$ )  | -0.400<br>( $<0.001$ ) | -0.502<br>( $<0.001$ ) | 0.255<br>(0.013)  | 0.483<br>( $<0.001$ )  | 0.470<br>( $<0.001$ )  | 0.491<br>( $<0.001$ )  | 0.474<br>( $<0.001$ )  | 0.561<br>( $<0.001$ )  | 0.428<br>( $<0.001$ )  | 0.436<br>( $<0.001$ )  | 1                      |

r=correlation coefficient, p=p value, PANSS=Positive and Negative Syndrome Scale, PANSSPTOTAL=Positive Symptoms score, PANSSNTOTAL=Negative Symptoms score, PANSSGTOTAL= General Psychopathology score, EQ=Empathy EQ=Empathy Quotient, FB=False Belief Task, HT=Hinting Task, RFP=Recognition of Faux Pas, UFPA=Understanding of Faux Pas(affective), UFPC=Understanding of Faux Pas(cognitive), EA=Empathetic Ability, RME=Reading the Mind in the Eyes.
